# Supplementary material for: GOLUM-CNP v1.0: a data-driven modeling of carbon, nitrogen andphosphorus cycles in major terrestrial biomes
Source: Copernicus journal article supplement (doi:10.5194/gmd-2018-23), 2018-03-22
Supplement: Supplementary file 1 [file gmd-2018-23-supplement.zip]

Supporting information of “GOLUM-CNP v1.0: a data-driven modeling of carbon, nitrogen and phosphorus cycles in major terrestrial biomes” by Yilong Wang, Philippe Ciais, Daniel Goll, Yuanyuan Huang, Yiqi Luo, Ying-Ping Wang, A. Anthony Bloom, Grégoire Broquet, Jens Hartmann, Shushi Peng, Josep Penuelas, Shilong Piao, Jordi Sardans, Benjamin D. Stocker, Rong Wang, Sönke Zaehle, Sophie Zechmeister-Boltenstern

**Table S1** C:N, C:P and N:P molar (atomic) ratios across major biomes from Zechmeister-Boltenstern et al. (2015). Targeted biomes are: tropical rain forests (TRF), temperate deciduous forests (TEDF), temperate coniferous forests (TECF), boreal coniferous forests (BOCF), tundra (TUN), tropical/C4 grasslands (TRG), and temperate/C3 grasslands (TEG). Note that N:P ratios in Zechmeister-Boltenstern et al. (2015) are not exactly equal to the ratio of C:P to C:N, but the differences are small.

|     |         | TRF   | TEDF  | TECF  | BOCF  | TRG  | TEG  | TUN  |
|-----|---------|-------|-------|-------|-------|------|------|------|
| C:N | Foliage | 25    | 25    | 59    | 49    | 39   | 25   | 49   |
|     | Root    | 47    | 59    | 67    | 57    | 39   | 88   | 54   |
|     | Wood    | 148   | 471   | 844   | 525   | --   | --   | --   |
|     | Soil    | 16    | 19    | 20    | 32    | 25   | 10   | 13   |
| C:P | Foliage | 1027  | 867   | 1232  | 1049  | 753  | 1278 | 2167 |
|     | Root    | 3125  | 1962  | 1186  | 1574  | 1300 | 2829 | 1300 |
|     | Wood    | 13574 | 11179 | 24297 | 19734 | --   | --   | --   |
|     | Soil    | 159   | 366   | 302   | 960   | 509  | 130  | 138  |
| N:P | Foliage | 43    | 36    | 23    | 23    | 20   | 53   | 45   |
|     | Root    | 52    | 22    | 18    | 30    | 32   | 27   | 20   |
|     | Wood    | 93    | 24    | 29    | 38    | --   | --   | --   |
|     | Soil    | 13    | 20    | 15    | 31    | 31   | --   | 11   |

**Table S2** Mean residence time of C, N and P in ecosystems (unit: years). Targeted biomes are: tropical rain forests (TRF), temperate deciduous forests (TEDF), temperate coniferous forests (TECF), boreal coniferous forests (BOCF), tundra (TUN), tropical/C4 grasslands (TRG), and temperate/C3 grasslands (TEG).

|   | TRF  | TEDF | TECF | BOCF | TRG  | TEG  | TUN  | Globe |
|---|------|------|------|------|------|------|------|-------|
| C | 29   | 49   | 48   | 106  | 40   | 67   | 101  | 38    |
| N | 382  | 1016 | 637  | 4834 | 987  | 3075 | 7896 | 1586  |
| P | 2520 | 3263 | 4413 | 6167 | 4483 | 6291 | 7077 | 6092  |

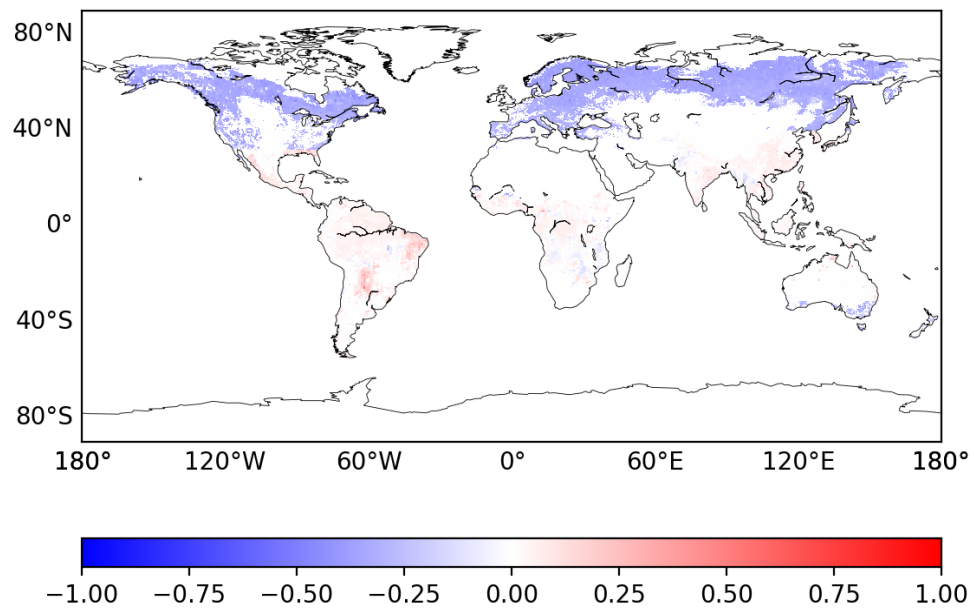

**Fig. S1** Relative differences in the woody biomass between the steady-state biomass in this study and the original CARDAMOM dataset. The grid cells dominated by grassland are excluded.

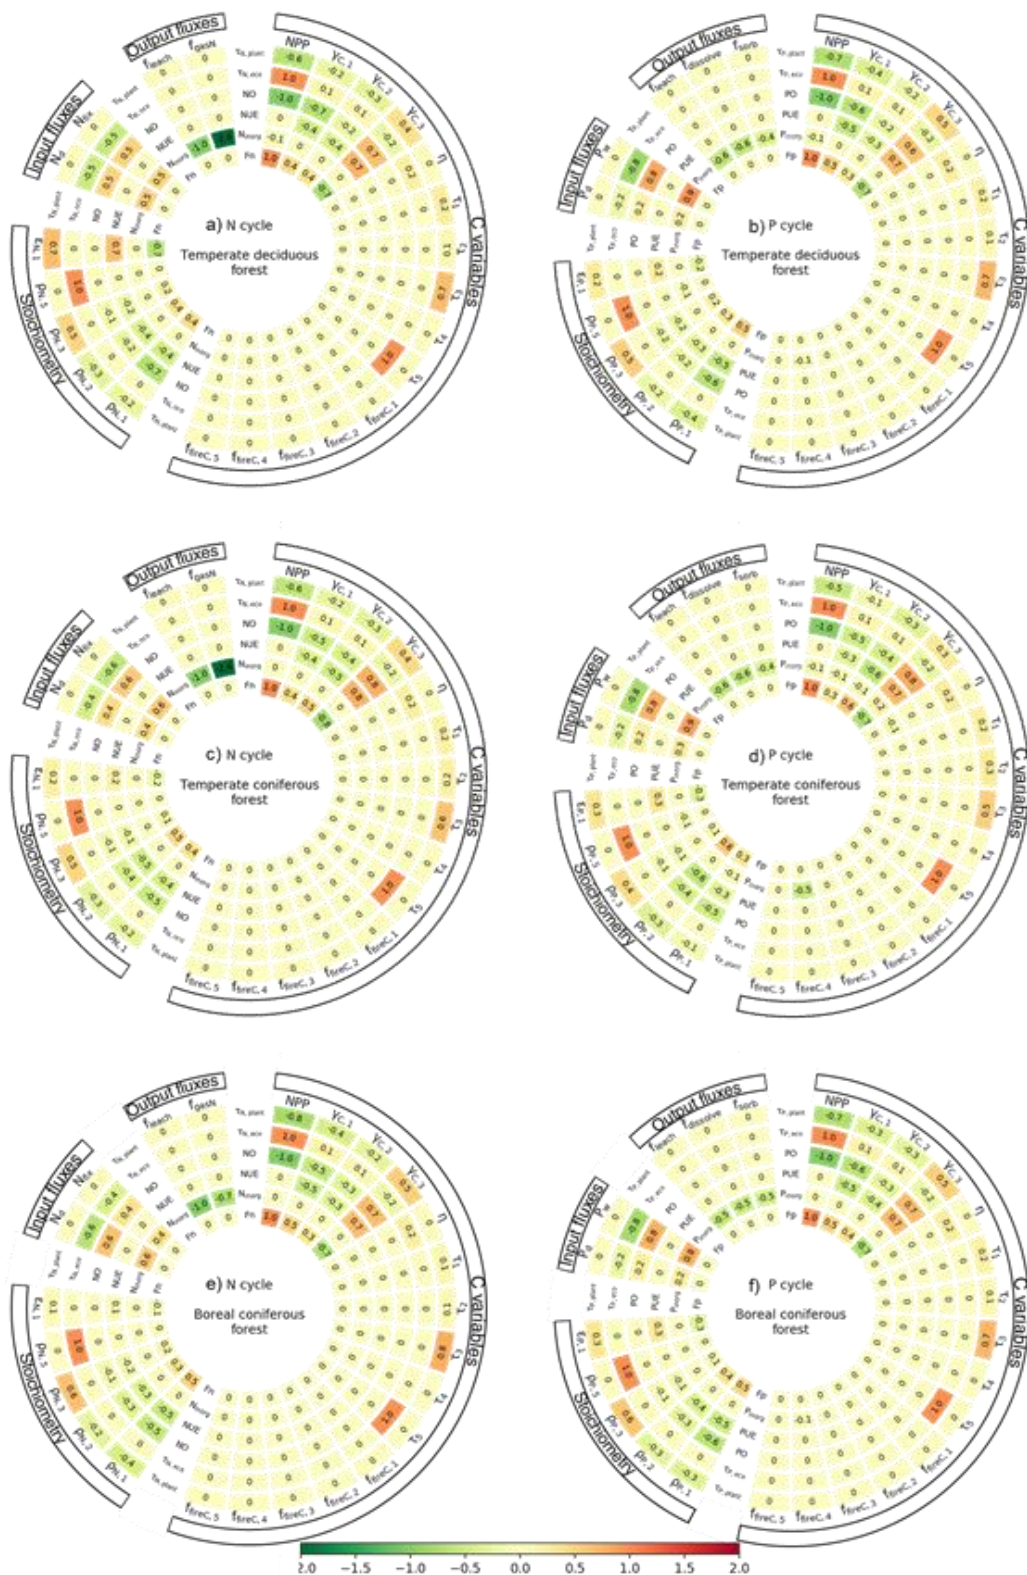

**Figure S2** Mean sensitivity of the estimates of rates of nutrient uptake, inorganic nutrients, nutrient-use efficiencies, openness, turnover time of nutrients in the ecosystem and turnover time of nutrients in plants to the input variables for temperate deciduous forests (a and b), temperate coniferous forests (c and d) and boreal coniferous forests (e and f).



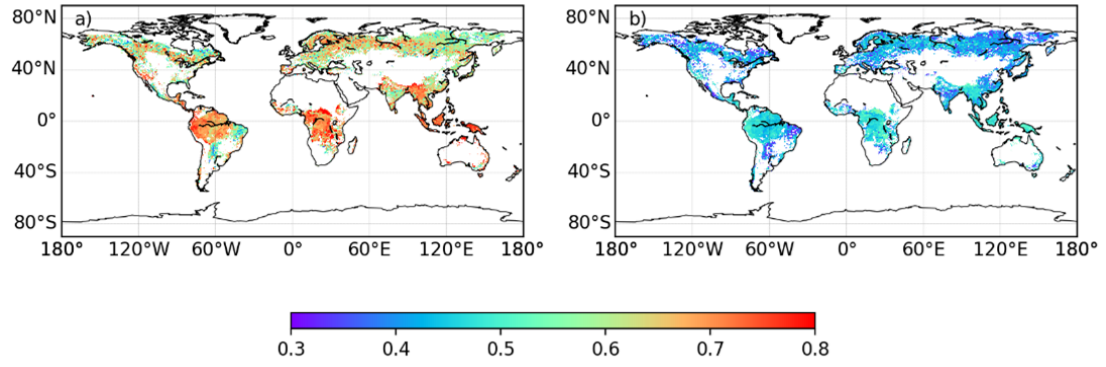

**Figure S4** NPP allocation fractions to woody biomass in original CARDAMOM (a) and adjusted (see Sect. 5.1) carbon cycle model (b).

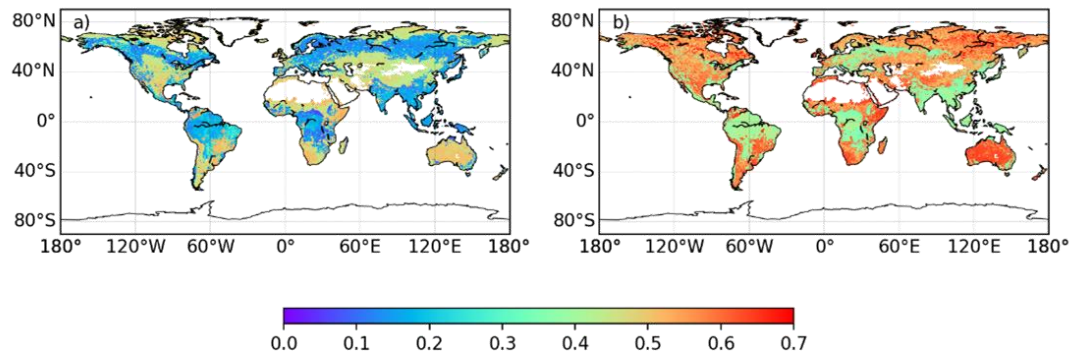

**Figure S5** NPP allocation fractions to fine roots in original CARDAMOM (a) and adjusted (see Sect. 5.1) carbon cycle model (b).

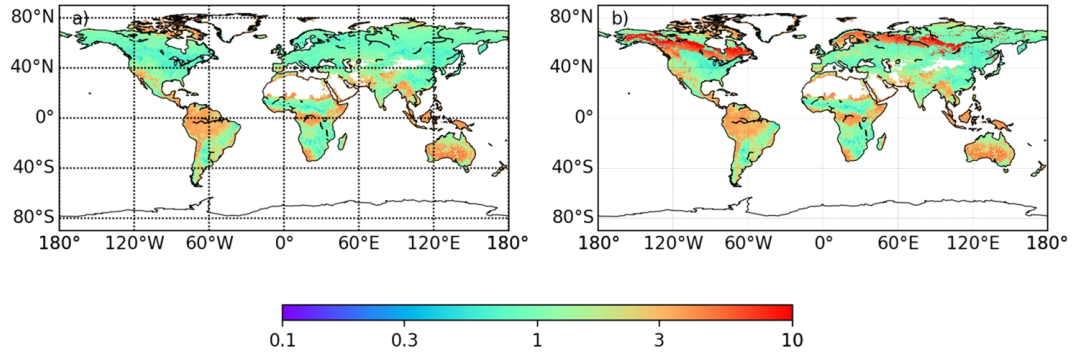

**Figure S6** Leaf longevity in original CARDAMOM (a) and adjusted (see Sect. 5.1) carbon cycle model (b).

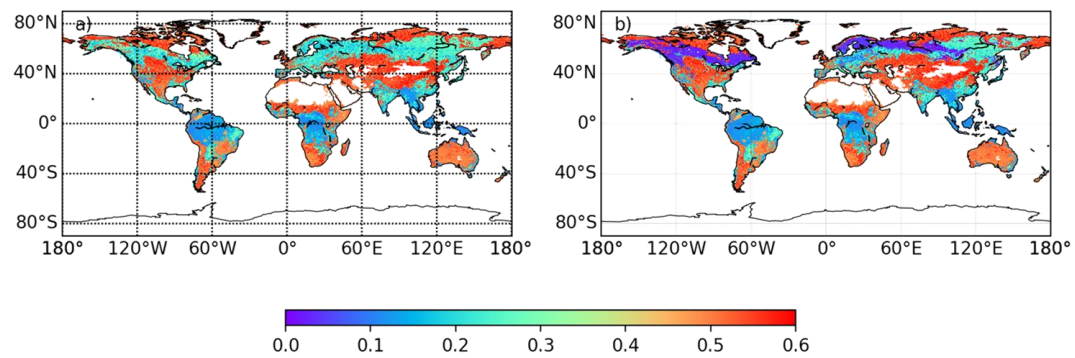

**Figure S7** NPP allocation fractions to foliage in original CARDAMOM (a) and adjusted (see Sect. 5.1) carbon cycle model (b).
